# Supplementary material for: A Lyman-α protocluster at redshift 6.9
Source: Springer Nature journal article supplement (doi:10.1038/s41550-020-01291-y), 2021-01-25
Supplement: 41550_2020_1291_MOESM1_ESM.pdf [file 41550_2020_1291_MOESM1_ESM.pdf]

**Supplementary information**

---

**A Lyman- $\alpha$  protocluster at redshift 6.9**

---

In the format provided by the  
authors and unedited

# LETTER

---

## A Lyman- $\alpha$ protocluster at redshift 6.9 Supplementary Information

Weida Hu, Junxian Wang, Leopoldo Infante, James E. Rhoads, Zhen-Ya Zheng, Huan Yang, Sangeeta Malhotra, L. Felipe Barrientos, Chunyan Jiang, Jorge González-López, Gonzalo Prieto, Lucia A. Perez, Pascale Hibon, Gaspar Galaz, Alicia Coughlin, Santosh Harish, Xu Kong, Wenyong Kang, Ali Ahmad Khostovan, John Pharo, Francisco Valdes, Isak Wold, Alistair R. Walker, XianZhong Zheng

1. Yajima, H., Sugimura, K. & Hasegawa, K. Modelling of Lyman-alpha emitting galaxies and ionized bubbles at the epoch of reionization. *Mon. Not. R. Astron. Soc.* **477**, 5406–5421 (2018).
2. Hu, W. *et al.* The Ly $\alpha$  Luminosity Function and Cosmic Reionization at  $z \sim 7.0$ : A Tale of Two LAGER Fields. *Astrophys. J.* **886**, 90 (2019).
3. Itoh, R. *et al.* CHORUS. II. Subaru/HSC Determination of the Ly $\alpha$  Luminosity Function at  $z = 7.0$ : Constraints on Cosmic Reionization Model Parameter. *Astrophys. J.* **867**, 46 (2018).

**Supplementary Table 1 | Properties of LAEs in the LAGER-z7OD1.** We list the 21 member LAEs in LAGER-z7OD1. Column 1 lists the source IDs of 21 LAEs. Columns 2 and 3 are the coordinates. Column 4 is the  $\text{Ly}\alpha$  photometric luminosity. Column 5 lists the redshifts inferred from the line center for spectroscopic confirmations. Columns 6 – 8 show their AUTO magnitude in the narrowbands DECcam-NB964, HSC-NB973, and underlying broadband HSC-y ( $2\sigma$  upper limits for non-detections). Column 9 lists the bubble size inferred using the relation in ref.<sup>1</sup>. Column 10 is the source IDs in ref.<sup>2</sup> (hereafter H19).

| ID                          | RA         | DEC         | $\log L_{\text{Ly}\alpha}$<br>( $\text{erg s}^{-1}$ ) | Redshift | DECcam-NB964<br>(mag) | HSC-NB973<br>(mag) | HSC-y<br>(mag)   | $R$<br>(cMpc) | ID in H19      |
|-----------------------------|------------|-------------|-------------------------------------------------------|----------|-----------------------|--------------------|------------------|---------------|----------------|
| Spectroscopically Confirmed |            |             |                                                       |          |                       |                    |                  |               |                |
| LAE-1                       | 10:02:06.0 | +02:06:46.3 | $43.54^{+0.03}_{-0.03}$                               | 6.938    | $23.08 \pm 0.06$      | $23.77^c$          | $25.30 \pm 0.33$ | 14.5          | COSMOS-1       |
| LAE-2                       | 10:01:53.5 | +02:04:59.8 | $43.33^{+0.07}_{-0.08}$                               | 6.932    | $23.22 \pm 0.10$      | $24.75^c$          | $24.11 \pm 0.12$ | 11.5          | COSMOS-3       |
| LAE-3                       | 10:03:10.5 | +02:12:30.8 | $43.49^{+0.04}_{-0.05}$                               | 6.923    | $23.17 \pm 0.08$      | **                 | $25.15 \pm 0.33$ | 13.7          | COSMOS-2       |
| LAE-4                       | 10:03:32.7 | +02:09:25.1 | $43.04^{+0.09}_{-0.11}$                               | 6.900    | $24.33 \pm 0.16$      | **                 | $26.42 \pm 0.70$ | 8.5           | COSMOS-10      |
| LAE-5                       | 10:03:30.7 | +02:14:08.5 | $43.03^{+0.07}_{-0.08}$                               | 6.899    | $24.37 \pm 0.13$      | **                 | $26.63 \pm 0.58$ | 8.0           | N <sup>a</sup> |
| LAE-6                       | 10:03:28.0 | +02:08:51.3 | $43.03^{+0.10}_{-0.14}$                               | 6.915    | $24.34 \pm 0.23$      | **                 | $26.45 \pm 0.34$ | 7.3           | N <sup>a</sup> |
| LAE-7                       | 10:03:05.2 | +02:09:14.7 | $42.79^{+0.12}_{-0.17}$                               | 6.945    | $24.69 \pm 0.19$      | $24.28 \pm 0.18$   | $25.81 \pm 0.35$ | 6.1           | N <sup>b</sup> |
| LAE-9                       | 10:03:16.0 | +02:15:42.3 | $42.70^{+0.13}_{-0.20}$                               | 6.920    | $24.95 \pm 0.21$      | **                 | $26.13 \pm 0.45$ | 6.4           | N <sup>a</sup> |
| LAE-10                      | 10:02:42.3 | +02:06:55.2 | $42.56^{+0.13}_{-0.18}$                               | 6.922    | $25.29 \pm 0.22$      | **                 | $26.42 \pm 0.28$ | 5.8           | N <sup>a</sup> |
| LAE-11                      | 10:02:39.4 | +02:07:12.1 | $42.69^{+0.14}_{-0.15}$                               | 6.962    | $25.13 \pm 0.21$      | $24.78^c$          | $26.84 \pm 0.53$ | 6.4           | COSMOS-41      |
| LAE-13                      | 10:02:33.5 | +02:07:09.5 | $42.68^{+0.12}_{-0.16}$                               | 6.936    | $25.14 \pm 0.20$      | **                 | $26.85 \pm 0.69$ | 6.4           | COSMOS-42      |
| LAE-15                      | 10:02:23.4 | +02:05:04.8 | $43.38^d$                                             | 6.971    | $25.04 \pm 0.19$      | $23.68^c$          | $26.41 \pm 0.34$ | 12.1          | COSMOS-49      |
| LAE-16                      | 10:02:32.9 | +02:05:52.8 | $42.85^{+0.08}_{-0.10}$                               | 6.915    | $24.82 \pm 0.18$      | **                 | $> 27.2$         | 7.3           | COSMOS-29      |
| LAE-17                      | 10:03:33.5 | +02:07:19.8 | $42.94^{+0.09}_{-0.11}$                               | 6.917    | $24.61 \pm 0.20$      | **                 | $> 27.2$         | 7.9           | COSMOS-17      |
| LAE-18                      | 10:03:37.3 | +02:07:36.7 | $42.86^{+0.08}_{-0.10}$                               | 6.953    | $24.81 \pm 0.18$      | **                 | $> 27.2$         | 7.3           | COSMOS-27      |
| LAE-19                      | 10:03:39.3 | +02:07:47.2 | $42.69^{+0.16}_{-0.25}$                               | 6.943    | $24.91 \pm 0.22$      | **                 | $25.93 \pm 0.50$ | 6.4           | COSMOS-34      |
| Not Yet Confirmed           |            |             |                                                       |          |                       |                    |                  |               |                |
| LAE-8                       | 10:02:09.0 | +02:04:11.0 | $42.84^{+0.11}_{-0.14}$                               | **       | $24.81 \pm 0.21$      | **                 | $26.8 \pm 0.62$  | 7.2           | COSMOS-25      |
| LAE-12                      | 10:03:00.1 | +02:14:49.5 | $42.81^{+0.10}_{-0.14}$                               | **       | $24.76 \pm 0.20$      | **                 | $26.24 \pm 0.28$ | 7.0           | COSMOS-24      |
| LAE-14                      | 10:02:08.3 | +02:06:59.6 | $42.79^{+0.14}_{-0.21}$                               | **       | $24.86 \pm 0.25$      | **                 | $26.45 \pm 0.67$ | 6.9           | COSMOS-30      |
| LAE-20                      | 10:02:47.1 | +02:10:40.1 | $43.05^d$                                             | **       | $25.40 \pm 0.24$      | $24.52^c$          | $26.86 \pm 0.44$ | 7.0           | N <sup>b</sup> |
| LAE-21                      | 10:03:15.6 | +02:18:11.3 | $42.87^{+0.09}_{-0.11}$                               | **       | $24.79 \pm 0.20$      | $25.73 \pm 0.51$   | $> 27.2$         | 6.9           | N <sup>b</sup> |

<sup>a</sup> LAE-5, 6, 9, 10 were not included in H19 as they are labelled as lower-grade candidates for various reasons (LAE-5: close to bad image regions; LAE-6: noisy signal in the NB image; LAE-9: adjacent to a foreground galaxy within  $3''$ ; LAE-10: with DECcam-NB964 signal lower than  $5\sigma$ ), but latterly got spectroscopically confirmed.

<sup>b</sup> LAE-7, 20, and 21 are selected using the stacked image of DECcam-NB964 and HSC-NB973 images.

<sup>c</sup> We adopt the HSC-NB973 magnitudes given in ref.<sup>3</sup>.

<sup>d</sup> We adopt the  $\text{Ly}\alpha$  luminosities given in ref.<sup>3</sup>, because their  $\text{Ly}\alpha$  lines locate in the red tail of the DECcam-NB964 and their  $\text{Ly}\alpha$  luminosities will be severely underestimated if using DECcam-NB964 magnitude.

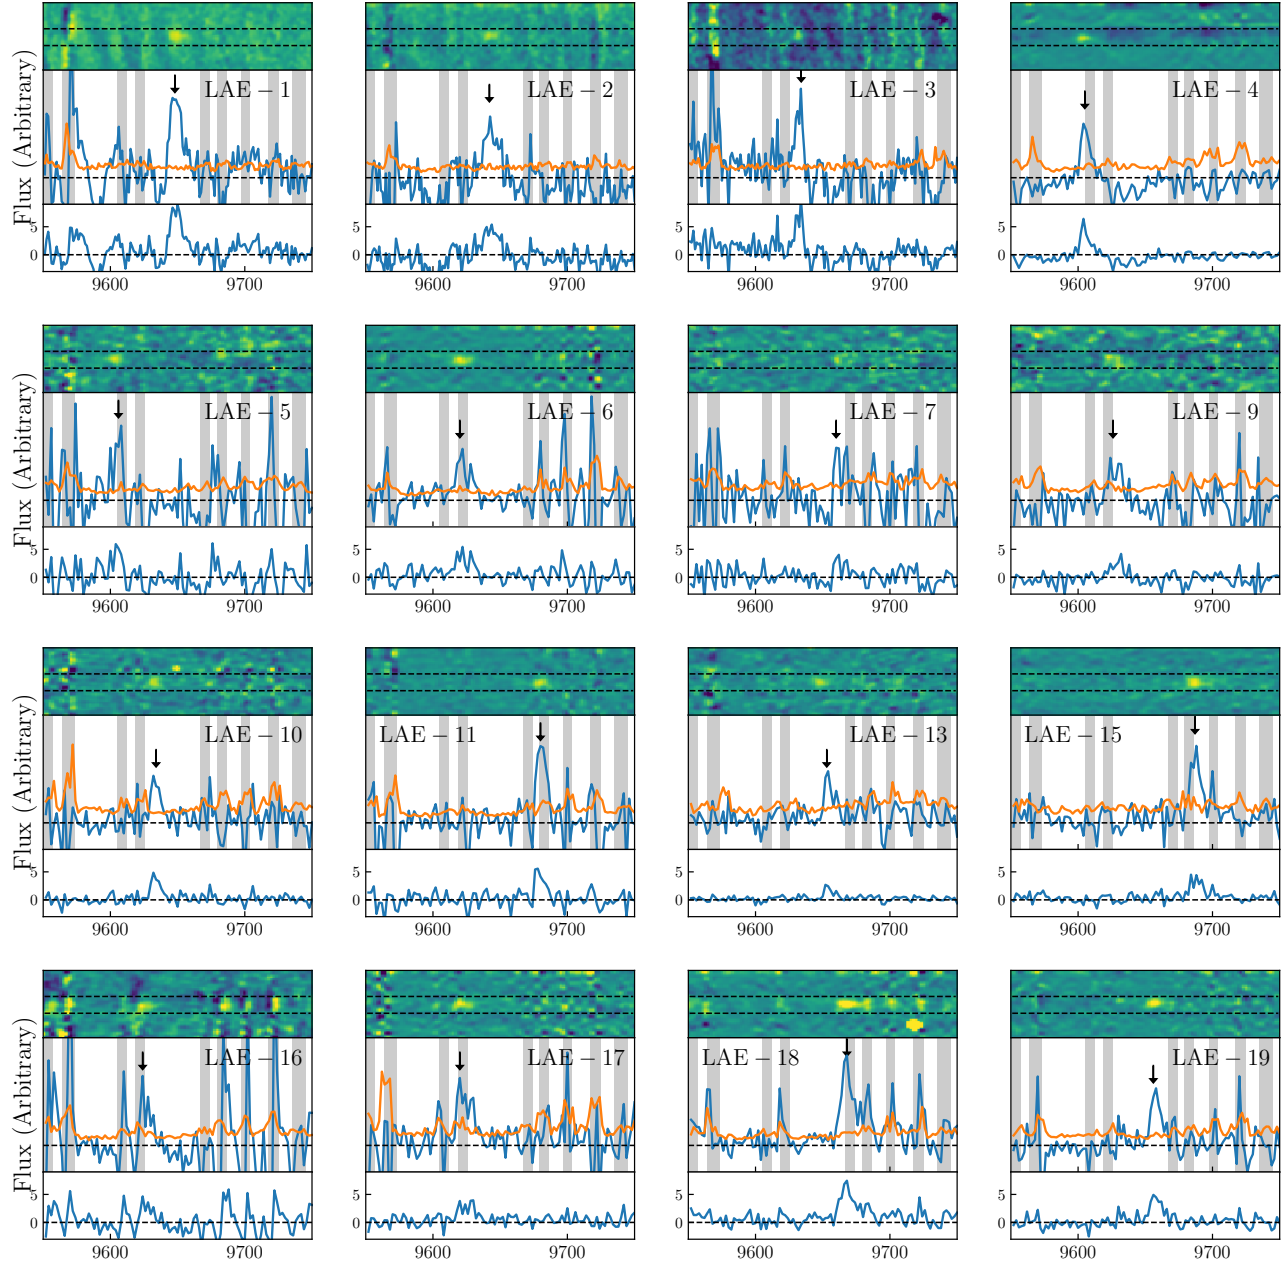

**Supplementary Figure 1 | Two- and one-dimensional spectra of 16 confirmed LAEs in LAGER-z7OD1.** In the top panel the two-dimensional spectra (yellow is high flux and blue is low flux) are smoothed by a Gaussian kernel with 1 pixel for better illustration. The two black dashed lines (separated by  $1''$  vertically) represent the expected slit position of LAEs in the 2D spectra. In the middle panel, the blue lines are the one-dimensional spectra and the orange lines are the noise spectra. The grey regions represent the sky OH lines (imperfect sky line subtraction could yield artificial signals visible in the spectra). The dashed horizontal lines indicate zero-flux level and the black arrows mark the peak of the identified  $\text{Ly}\alpha$  line profiles. In the bottom panel, we plot the  $S/N$  spectra with the dashed horizontal lines showing zero  $S/N$ . Due to the flaws in the slit, LAE-16 shows a noisy 2D spectrum. However, a clear broad red wing of the line is revealed which falls in the skylines free region, and the line is considerably broader than artificial line signals in the spectrum. Thus, we identify it as a  $\text{Ly}\alpha$  line.
